# Supplementary material
Source: Springer Nature journal article supplement (https://www.springermedizin.de/resource/supplementary/12891_2013_2011_MOESM6_ESM.pdf/9509482)

TLR4:

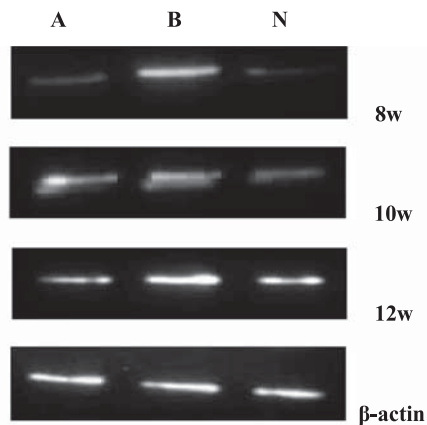

NF-κB p65:

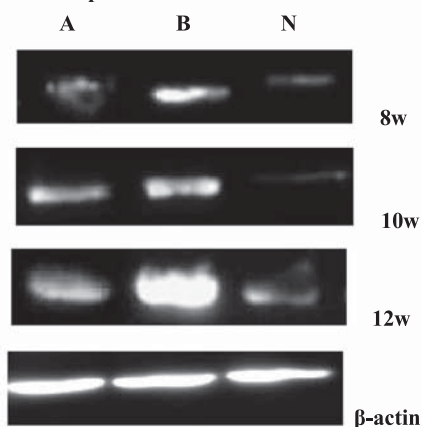

MyD88:

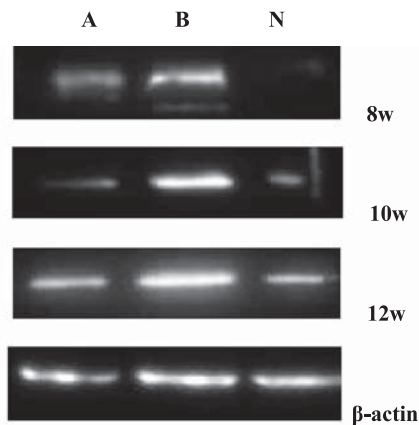

MCP-1:

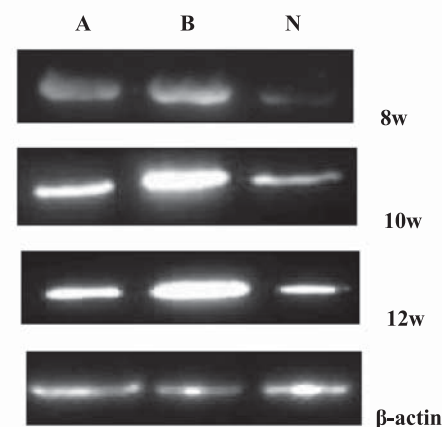

Protein level of TLR4

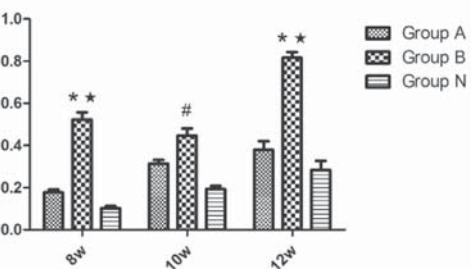

Protein level of MyD88

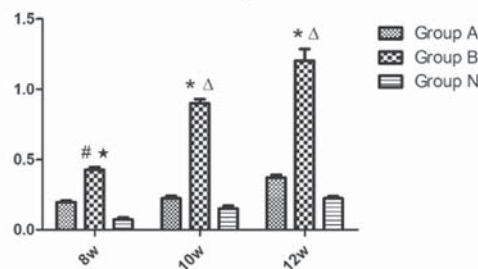

Protein level of NF-κB p65

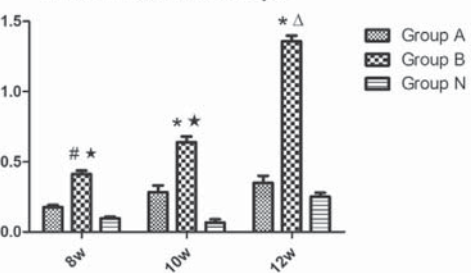

Protein level of MCP-1

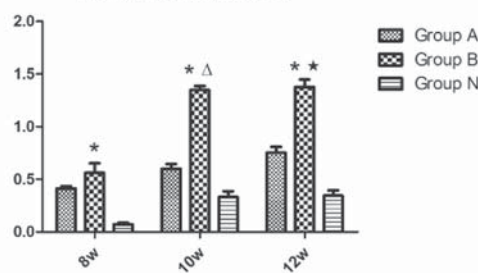

Supplement: MOESM6 [file 9509482]
